# Supplementary material
Source: Springer Nature journal article supplement (https://www.springermedizin.de/resource/supplementary/12895_2010_103_MOESM1_ESM.pdf/9514086)

Ketoconazole

Terbinafine

Amphotericin B

Abelcet

Granulocytes transfusion + G-CSF

Flucytosine

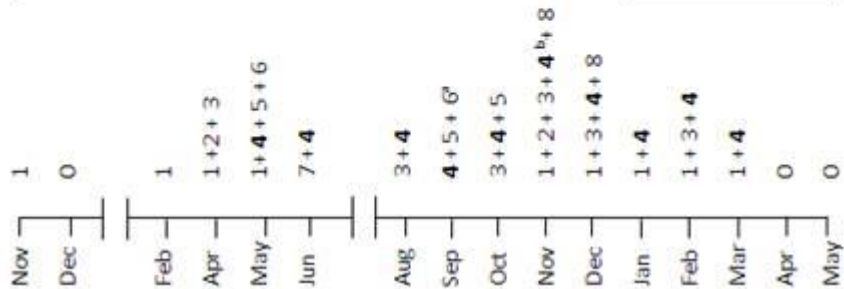

Supplement: MOESM1 [file 9514086]
